# Supplementary material
Source: publisher figshare collection journal article supplement (https://gsajournals.figshare.com/articles/dataset/_/12563912)
Supplement: Supplementary file 1 [file 1]

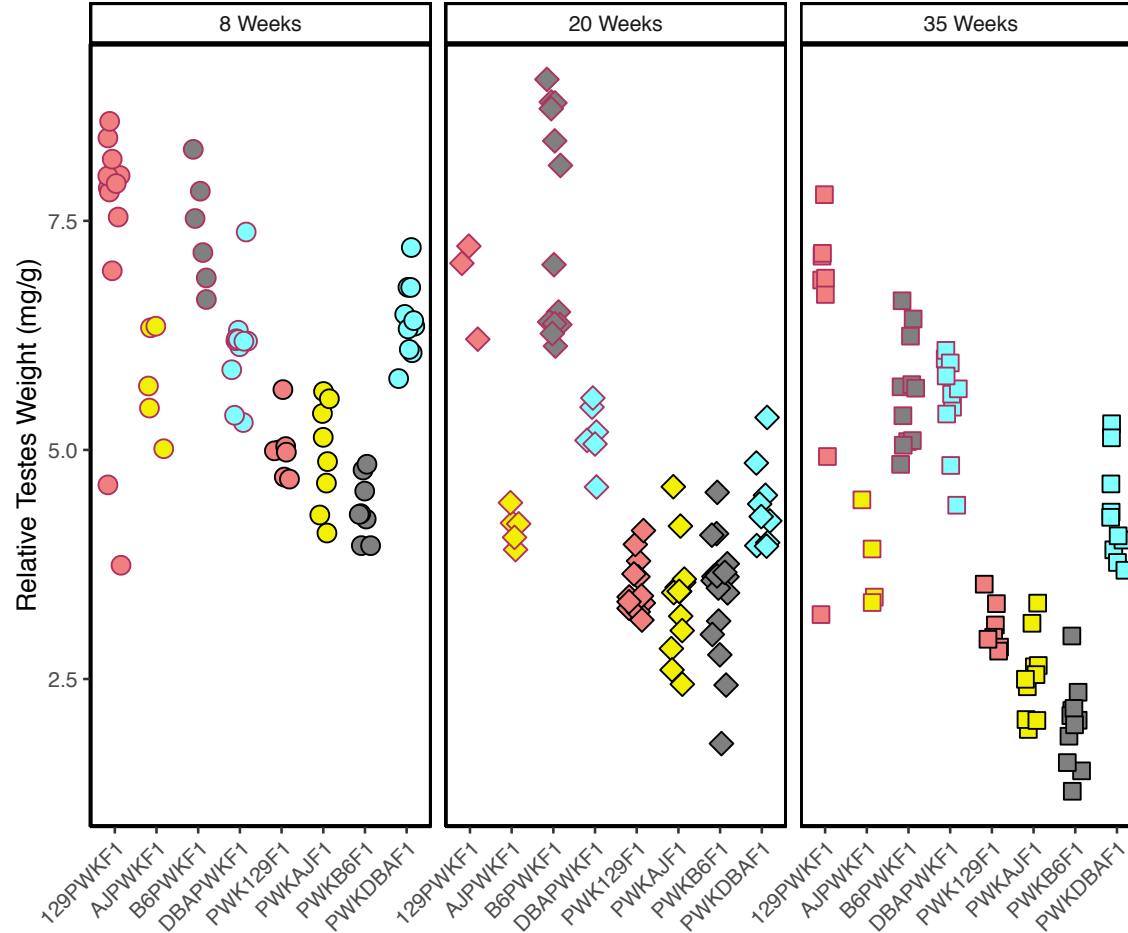

**Figure S1. Testes weights scaled by body weight.** DM hybrid males (red borders) had consistently heavier testes than MD hybrid males (black borders) when scaling by body weight, with the exception of the fertile DBA2-derived hybrids (light blue). This is the same pattern seen when not taking body weight into account (Figure 2).
